# Supplementary material
Source: publisher site journal article supplement (http://www.aging-us.com/papers/v8/n5/pdf/100948.pdf)
Supplement: Supplementary file 1 [file 100948.pdf]

 


Aging
